# Supplementary material
Source: Springer Nature journal article supplement (https://www.springermedizin.de/resource/supplementary/13098_2010_88_MOESM1_ESM.pdf/9670490)

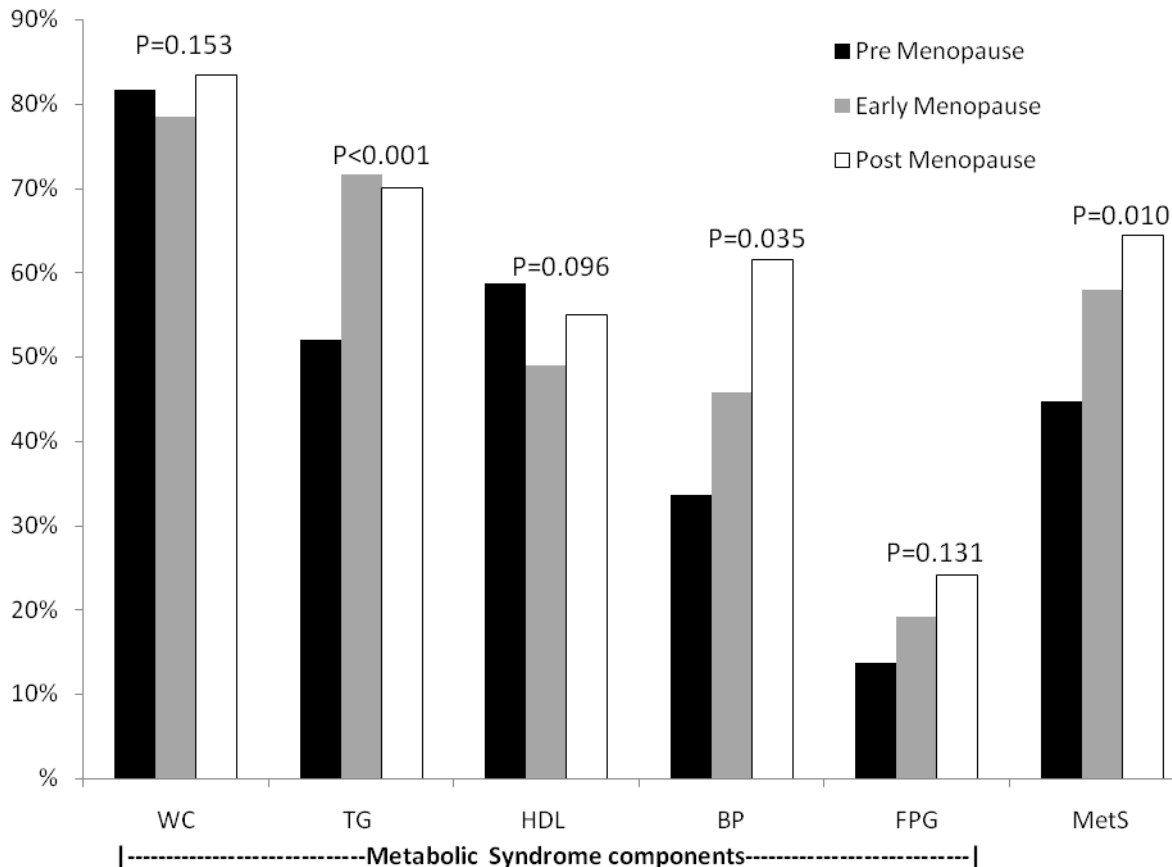

Supplement: MOESM1 [file 9670490]
